# Supplementary material
Source: PubMed Central journal article supplement (PMC5752842)
Supplement: cr2017141x1.pdf [file cr2017141x1.pdf]

**Supplementary information, Table S1** Oligos used in this study

| Oligonucleotides                               | Name           | sequence(5'-3')      |
|------------------------------------------------|----------------|----------------------|
| Telomeric DNA oligos<br>for Crystallization    | TTAGGG-f(18bp) | GGTTAGGGTTAGGGTTAG   |
|                                                | TTAGGG-r(18bp) | CCTAACCCCTAACCCCTAAC |
| oligos for Fluorescence<br>polarization assays | TTAGGG-fam(WT) | fam-GGTTAGGGTTAG     |
|                                                | TTAGGG-r       | CTAACCCCTAACCC       |
|                                                | TCAGGG-fam     | fam-GGTCAGGGTCAG     |
|                                                | TCAGGG-r       | CTGACCCTGACC         |
|                                                | TTGGGG-fam     | fam-GGTTGGGGTTGG     |
|                                                | TTGGGG-r       | CCAACCCCAACC         |
|                                                | TGAGGG-fam     | fam-GGTGAGGGTGAG     |
|                                                | TGAGGG-r       | CTCACCCCTCACC        |
|                                                | CTAGGG-fam     | fam-GGCTAGGGCTAG     |
|                                                | CTAGGG-r       | CTAGCCCTAGCC         |
|                                                | TTAAGG-fam     | fam-GGTTAAGGTTAA     |
|                                                | TTAAGG-r       | TTAACCTTAACC         |
|                                                | TTAGAG-fam     | fam-AGTTAGAGTTAG     |
|                                                | TTAGAG-r       | CTAACTCTAACT         |
|                                                | TTAGGA-fam     | fam-GATTAGGATTAG     |
|                                                | TTAGGA-r       | CTAATCCTAATC         |

**Supplementary information, Table S2** Data collection, and refinement statistics

| TZAP-Telomeric DNA                                      |                                          |
|---------------------------------------------------------|------------------------------------------|
| Wavelength(Å)                                           | 0.978                                    |
| Space group                                             | <i>P</i> 4 <sub>3</sub> 2 <sub>1</sub> 2 |
| Cell parameters                                         |                                          |
| a, b, c (Å)                                             | 56.7, 56.7, 226.2                        |
| α, β, γ (°)                                             | 90, 90, 90                               |
| Resolution(Å)                                           | 40.00-2.85(2.92-2.85)                    |
| <i>R</i> <sub>merge</sub> (%)                           | 7.1(98.3)                                |
| <i>I</i> / <i>σ</i> <i>I</i>                            | 37.6(2.0)                                |
| Completeness (%)                                        | 100.0(100.0)                             |
| Average redundancy                                      | 23.7(21.2)                               |
| <b>Refinement(F&gt;0)</b>                               |                                          |
| No. reflections<br>(overall)                            | 9190                                     |
| No. reflections (test<br>set)                           | 446                                      |
| <i>R</i> <sub>work</sub> / <i>R</i> <sub>free</sub> (%) | 22.61/26.78                              |
| Number of atoms                                         |                                          |
| Protein/Znf10/Znf11-C                                   | 1093/350/743                             |
| DNA                                                     | 732                                      |
| ZN                                                      | 4                                        |
| <i>B</i> factors (Å <sup>2</sup> )                      |                                          |
| Protein/Znf10/Znf11-C                                   | 105.48/139.79/89.32                      |
| DNA                                                     | 87.99                                    |
| ZN                                                      | 88.43                                    |
| r.m.s. deviations                                       |                                          |
| Bond lengths (Å)                                        | 0.004                                    |
| Bond angles (°)                                         | 0.590                                    |
| Rampage plot %<br>residues                              |                                          |
| Favored                                                 | 89.39                                    |
| Allowed                                                 | 10.61                                    |
| Outliers                                                | 0                                        |

<sup>a</sup> Values in parentheses are for highest-resolution shell.
